# Supplementary material for: Assessment of Lithium, Macro- and Microelements in Water, Soil and Plant Samples from Karst Areas in Romania
Source: MDPI journal article supplement (doi:10.3390/ma14144002), 2021-07-17
Supplement: s1 [file s1]

# Assessment of lithium, macro- and microelements in water, soil and plant samples from karst areas in Romania

Anamaria Iulia Torok<sup>1</sup>, Ana Moldovan<sup>1,2\*</sup>, Erika Andrea Levei<sup>1</sup>, Oana Cadar<sup>1</sup>, Claudiu Tănăsolia<sup>1</sup> and Oana Teodora Moldovan<sup>3</sup>

<sup>1</sup> INCDO-INOE 2000, Research Institute for Analytical Instrumentation, 67 Donath Street, 400293 Cluj-Napoca, Romania; [ana.moldovan@icia.ro](mailto:ana.moldovan@icia.ro) (A.M.); [erika.levei@icia.ro](mailto:erika.levei@icia.ro) (E.A.L); [oana.cadar@icia.ro](mailto:oana.cadar@icia.ro) (O.C.); [claudiu.tanasolia@icia.ro](mailto:claudiu.tanasolia@icia.ro) (C.T); [iulia.torok@icia.ro](mailto:iulia.torok@icia.ro) (I.A.T)

<sup>2</sup> Faculty of Materials and Environmental Engineering, Technical University, 103-105 Muncii Boulevard, 400641 Cluj-Napoca, Romania; [ana.moldovan@icia.ro](mailto:ana.moldovan@icia.ro) (A.M.)

<sup>3</sup> Cluj Department, Emil Racovita Institute of Speleology, 5 Clinicilor, 400006 Cluj-Napoca, Romania; [panamol35@gmail.com](mailto:panamol35@gmail.com) (O.A.M.)

\* Correspondence: [ana.moldovan@icia.ro](mailto:ana.moldovan@icia.ro)

This online resource contains the following data:

The concentration of macro and microelements and standard deviation of the triplicates in water, soil and plant samples presented in Table S1 and Table S2, respectively.

**Table S1.** Concentration (average  $\pm$  standard deviation, n=3) of macroelements in water, soil and plant samples (L=*Lolium* sp., U=*Urtica* sp., M=*Mentha* sp.).

| Sample                                    | Fe              | Na                 | Mg               | K                | Ca                 |
|-------------------------------------------|-----------------|--------------------|------------------|------------------|--------------------|
| <b>Water (<math>\mu\text{g/L}</math>)</b> |                 |                    |                  |                  |                    |
| GN                                        | 26.3 $\pm$ 1.84 | 1373 $\pm$ 68.6    | 5005 $\pm$ 551   | 1151 $\pm$ 104   | 119000 $\pm$ 11900 |
| GWR6                                      | 20.2 $\pm$ 1.82 | 9598 $\pm$ 672     | 6314 $\pm$ 379   | 1370 $\pm$ 41.1  | 110700 $\pm$ 8856  |
| GWR27                                     | 6.70 $\pm$ 0.54 | 76390 $\pm$ 5347   | 50730 $\pm$ 2537 | 1483 $\pm$ 104   | 77760 $\pm$ 8554   |
| GWR28                                     | 7.50 $\pm$ 0.45 | 49890 $\pm$ 4490   | 32550 $\pm$ 977  | 1345 $\pm$ 121   | 84390 $\pm$ 3376   |
| GWR29                                     | 5.30 $\pm$ 0.58 | 80600 $\pm$ 2418   | 98580 $\pm$ 6901 | 6726 $\pm$ 673   | 59060 $\pm$ 3544   |
| GWR30                                     | 2.30 $\pm$ 0.09 | 155600 $\pm$ 14004 | 71790 $\pm$ 2872 | 3182 $\pm$ 350   | 31280 $\pm$ 1251   |
| <b>Soil (mg/kg DW)</b>                    |                 |                    |                  |                  |                    |
| GN                                        | 5640 $\pm$ 338  | 78.5 $\pm$ 7.06    | 5673 $\pm$ 454   | 2026 $\pm$ 60.8  | 9733 $\pm$ 681     |
| GWR6                                      | 5390 $\pm$ 162  | 32.2 $\pm$ 1.61    | 992 $\pm$ 29.8   | 1345 $\pm$ 121   | 9537 $\pm$ 1049    |
| GWR27                                     | 4347 $\pm$ 304  | 513 $\pm$ 35.9     | 7137 $\pm$ 785   | 2986 $\pm$ 209   | 57600 $\pm$ 6336   |
| GWR28                                     | 4367 $\pm$ 131  | 360 $\pm$ 32.4     | 8310 $\pm$ 914   | 2451 $\pm$ 123   | 70767 $\pm$ 5661   |
| GWR29                                     | 3094 $\pm$ 340  | 136 $\pm$ 6.82     | 7987 $\pm$ 479   | 4333 $\pm$ 217   | 199733 $\pm$ 15979 |
| GWR30                                     | 3940 $\pm$ 315  | 353 $\pm$ 31.8     | 10780 $\pm$ 755  | 4480 $\pm$ 358   | 110933 $\pm$ 5547  |
| <b>Plant (mg/kg DW)</b>                   |                 |                    |                  |                  |                    |
| GN L                                      | 210 $\pm$ 18.9  | 32.9 $\pm$ 3.30    | 1256 $\pm$ 62.8  | 13375 $\pm$ 1070 | 3974 $\pm$ 318     |
| GN U                                      | 123 $\pm$ 11.1  | 40.6 $\pm$ 3.66    | 4001 $\pm$ 240   | 23038 $\pm$ 2304 | 13113 $\pm$ 656    |
| GWR6 L                                    | 206 $\pm$ 8.23  | 391 $\pm$ 19.5     | 1866 $\pm$ 112   | 16775 $\pm$ 1174 | 11249 $\pm$ 562    |
| GWR6 U                                    | 82.9 $\pm$ 5.80 | 28.4 $\pm$ 2.56    | 3190 $\pm$ 351   | 22800 $\pm$ 684  | 28850 $\pm$ 2020   |
| GWR27 L                                   | 515 $\pm$ 56.6  | 757 $\pm$ 68.1     | 2170 $\pm$ 217   | 8084 $\pm$ 485   | 3751 $\pm$ 150     |
| GWR27 M                                   | 680 $\pm$ 408   | 546 $\pm$ 38.2     | 4732 $\pm$ 237   | 12513 $\pm$ 500  | 13900 $\pm$ 973    |
| GWR28 L                                   | 220 $\pm$ 19.8  | 1290 $\pm$ 51.6    | 1855 $\pm$ 204   | 11129 $\pm$ 1113 | 2674 $\pm$ 134     |
| GWR28 M                                   | 406 $\pm$ 24.3  | 1383 $\pm$ 82.9    | 3535 $\pm$ 106   | 14938 $\pm$ 896  | 13325 $\pm$ 800    |
| GWR29 M                                   | 281 $\pm$ 19.6  | 273 $\pm$ 21.8     | 4940 $\pm$ 445   | 14763 $\pm$ 1476 | 14638 $\pm$ 439    |
| GWR29 U                                   | 141 $\pm$ 7.06  | 269 $\pm$ 10.8     | 7533 $\pm$ 452   | 15250 $\pm$ 1525 | 24813 $\pm$ 2481   |
| GWR30 L                                   | 141 $\pm$ 15.5  | 9838 $\pm$ 984     | 8024 $\pm$ 401   | 21450 $\pm$ 2145 | 7145 $\pm$ 357     |
| GWR30 M                                   | 174 $\pm$ 12.1  | 510 $\pm$ 51.0     | 5933 $\pm$ 297   | 16825 $\pm$ 1682 | 8649 $\pm$ 865     |

**Table S2.** Concentration (average  $\pm$  standard deviation, n=3) of microelements in water, soil and plant samples (L=*Lolium* sp., U=*Urtica* sp., M=*Mentha* sp.).

| Sample                                    | Al         | Mn         | Ni         | Cr         | Co         | Cu         | Zn         | Pb         | Ba         | V          | Sr         | Li         |
|-------------------------------------------|------------|------------|------------|------------|------------|------------|------------|------------|------------|------------|------------|------------|
| <b>Water (<math>\mu\text{g/L}</math>)</b> |            |            |            |            |            |            |            |            |            |            |            |            |
| GN                                        | <0.7       | <0.7       | 5.00       | 14.8       | <0.7       | 2.12       | 17.0       | <0.7       | 15.2       | <0.7       | 180        | 1.46       |
|                                           | ND         | ND         | $\pm 0.20$ | $\pm 1.33$ | ND         | $\pm 0.06$ | $\pm 1.87$ | ND         | $\pm 1.67$ | ND         | $\pm 16.2$ | $\pm 0.07$ |
| GWR6                                      | <0.7       | <0.7       | 4.25       | 14.1       | <0.7       | 2.56       | 9.19       | <0.7       | 24.0       | <0.7       | 194        | 1.40       |
|                                           | ND         | ND         | $\pm 0.26$ | $\pm 0.85$ | ND         | $\pm 0.28$ | $\pm 0.28$ | ND         | $\pm 2.16$ | ND         | $\pm 15.5$ | $\pm 0.08$ |
| GWR27                                     | <0.7       | <0.7       | 3.40       | 5.02       | <0.7       | 1.06       | 6.10       | <0.7       | 15.9       | <0.7       | 613        | 12.2       |
|                                           | ND         | ND         | $\pm 0.20$ | $\pm 0.20$ | ND         | $\pm 0.11$ | $\pm 0.49$ | ND         | $\pm 1.43$ | ND         | $\pm 49.0$ | $\pm 0.73$ |
| GWR28                                     | <0.7       | <0.7       | 3.58       | 2.27       | <0.7       | 0.98       | 2.50       | <0.7       | 22.4       | <0.7       | 399        | 5.60       |
|                                           | ND         | ND         | $\pm 0.14$ | $\pm 0.14$ | ND         | $\pm 0.04$ | $\pm 0.20$ | ND         | $\pm 1.57$ | ND         | $\pm 43.8$ | 0.28       |
| GWR29                                     | <0.7       | <0.7       | 3.03       | 25.4       | <0.7       | 1.40       | 5.00       | <0.7       | 60.2       | <0.7       | 609        | 3.00       |
|                                           | ND         | ND         | $\pm 0.15$ | $\pm 0.76$ | ND         | $\pm 0.15$ | $\pm 0.15$ | ND         | 3.01       | ND         | $\pm 36.5$ | $\pm 0.24$ |
| GWR30                                     | <0.7       | <0.7       | 2.15       | 52.4       | <0.7       | 1.47       | 3.40       | <0.7       | 55.3       | <0.7       | 425        | 3.70       |
|                                           | ND         | ND         | $\pm 0.17$ | $\pm 5.24$ | ND         | $\pm 0.09$ | $\pm 0.31$ | ND         | $\pm 1.66$ | ND         | $\pm 34.0$ | $\pm 0.15$ |
| <b>Soil (mg/kg DW)</b>                    |            |            |            |            |            |            |            |            |            |            |            |            |
| GN                                        | 17143      | 261        | 13.5       | 19.1       | 6.14       | 7.69       | 22.5       | 4.83       | 35.9       | 24.7       | 10.9       | 9.12       |
|                                           | $\pm 1200$ | $\pm 28.7$ | $\pm 0.4$  | $\pm 0.57$ | $\pm 0.31$ | $\pm 0.46$ | $\pm 2.47$ | $\pm 0.43$ | $\pm 1.44$ | $\pm 2.48$ | $\pm 0.33$ | $\pm 0.64$ |
| GWR6                                      | 6237       | 219        | 7.59       | 7.30       | 4.06       | 5.42       | 20.3       | 6.54       | 58.2       | 10.0       | 32.8       | 6.50       |
|                                           | $\pm 499$  | $\pm 24.1$ | $\pm 0.46$ | $\pm 0.73$ | $\pm 0.20$ | $\pm 0.60$ | $\pm 1.22$ | $\pm 0.52$ | $\pm 5.82$ | $\pm 0.90$ | $\pm 2.95$ | $\pm 0.26$ |
| GWR27                                     | 15283      | 143        | 9.70       | 12.5       | 2.87       | 12.6       | 35.7       | 1.64       | 36.7       | 13.3       | 94.7       | 9.95       |
|                                           | $\pm 1223$ | 14.3       | $\pm 0.58$ | $\pm 1.37$ | $\pm 0.26$ | $\pm 0.88$ | $\pm 3.21$ | $\pm 0.11$ | $\pm 2.57$ | $\pm 0.40$ | $\pm 8.52$ | $\pm 1.00$ |
| GWR28                                     | 16553      | 183        | 4.97       | 11.6       | 1.63       | 12.0       | 34.7       | 1.68       | 40.4       | 11.5       | 74.7       | 10.0       |
|                                           | $\pm 828$  | $\pm 14.6$ | $\pm 0.45$ | $\pm 0.46$ | $\pm 0.13$ | $\pm 0.72$ | $\pm 1.74$ | $\pm 0.08$ | $\pm 2.43$ | $\pm 0.80$ | $\pm 3.73$ | $\pm 0.50$ |
| GWR29                                     | 13853      | 92.7       | 4.03       | 4.33       | 1.22       | 10.1       | 32.8       | 0.932      | 15.6       | 5.46       | 69.3       | 11.3       |
|                                           | $\pm 1247$ | $\pm 7.41$ | $\pm 0.24$ | $\pm 0.35$ | $\pm 0.05$ | $\pm 0.60$ | $\pm 2.30$ | $\pm 0.04$ | $\pm 0.62$ | $\pm 0.27$ | $\pm 7.63$ | $\pm 0.79$ |
| GWR30                                     | 18760      | 173        | 8.33       | 12.23      | 2.08       | 13.7 $\pm$ | 50.4 $\pm$ | 2.07       | 49.8       | 9.52       | 73.3       | 9.85       |
|                                           | $\pm 2064$ | $\pm 6.93$ | $\pm 0.42$ | $\pm 0.98$ | $\pm 0.08$ | 0.82       | 5.04       | $\pm 0.08$ | $\pm 4.48$ | $\pm 0.67$ | $\pm 4.40$ | $\pm 0.69$ |
| <b>Plant (mg/kg DW)</b>                   |            |            |            |            |            |            |            |            |            |            |            |            |
| GN L                                      | 187        | 25.6       | 0.80       | 2.64       | 5.35       | 1.74       | 7.26       | 0.16       | 12.2       | <0.02      | 2.63       | 0.21       |
|                                           | $\pm 13.1$ | $\pm 2.82$ | $\pm 0.06$ | $\pm 0.21$ | $\pm 0.16$ | $\pm 0.12$ | $\pm 0.29$ | $\pm 0.01$ | $\pm 0.85$ | ND         | $\pm 0.26$ | $\pm 0.02$ |
| GN U                                      | 259        | 17.8       | 0.37       | 0.30       | 0.20       | 1.24       | 1.54       | 0.13       | 22.2       | <0.02      | 7.04       | 0.24       |
|                                           | $\pm 28.5$ | $\pm 0.53$ | $\pm 0.01$ | $\pm 0.03$ | $\pm 0.01$ | $\pm 0.11$ | $\pm 0.05$ | $\pm 0.01$ | $\pm 0.89$ | ND         | $\pm 0.42$ | $\pm 0.03$ |
| GWR6 L                                    | 466        | 27.2       | 0.73       | 4.56       | 0.50       | 1.59       | 4.93       | 0.21       | 6.50       | <0.02      | 7.78       | 0.45       |
|                                           | $\pm 41.9$ | $\pm 2.72$ | $\pm 0.07$ | $\pm 0.50$ | $\pm 0.02$ | $\pm 0.18$ | $\pm 0.54$ | $\pm 0.02$ | $\pm 0.39$ | ND         | $\pm 0.23$ | $\pm 0.02$ |
| GWR6 U                                    | 203        | 19.1       | 0.49       | 0.36       | 0.10       | 1.27       | 2.45       | 0.06       | 16.8       | <0.02      | 22.9       | 0.19       |
|                                           | $\pm 12.2$ | $\pm 0.57$ | $\pm 0.03$ | $\pm 0.01$ | $\pm 0.01$ | $\pm 0.08$ | $\pm 0.27$ | $\pm 0.01$ | $\pm 1.69$ | ND         | $\pm 0.92$ | $\pm 0.01$ |
| GWR27 L                                   | 991        | 119        | 2.85       | 9.01       | 0.65       | 4.14       | 19.6       | 0.20       | 9.13       | 1.26       | 24.2       | 8.83       |
|                                           | $\pm 59.5$ | $\pm 10.7$ | $\pm 0.20$ | $\pm 0.54$ | $\pm 0.05$ | $\pm 0.41$ | $\pm 1.96$ | $\pm 0.01$ | $\pm 0.64$ | $\pm 0.13$ | $\pm 1.94$ | $\pm 0.88$ |
| GWR27 M                                   | 1734       | 58.5       | 1.60       | 3.10       | 0.89       | 7.59       | 27.6       | 0.26       | 17.5       | 1.35       | 64.4       | 2.84       |
|                                           | $\pm 156$  | $\pm 4.10$ | $\pm 0.05$ | $\pm 0.09$ | $\pm 0.04$ | $\pm 0.23$ | $\pm 2.76$ | $\pm 0.02$ | $\pm 1.40$ | $\pm 0.09$ | $\pm 5.79$ | $\pm 0.11$ |
| GWR28 L                                   | 493 $\pm$  | 70.2       | 0.89       | 3.20       | 0.34       | 2.51       | 7.34       | 0.08       | 11.4       | 0.53       | 13.5       | 11.1       |
|                                           | 54.3       | $\pm 3.51$ | $\pm 0.03$ | $\pm 0.10$ | $\pm 0.03$ | $\pm 0.10$ | $\pm 0.81$ | $\pm 0.01$ | $\pm 0.77$ | $\pm 0.06$ | $\pm 1.48$ | $\pm 0.89$ |
| GWR28 M                                   | 1010       | 28.8       | 2.03       | 4.78       | 0.86       | 11.9       | 23.2       | 0.12       | 12.9       | 0.71       | 36.4       | 2.17       |
|                                           | $\pm 70.7$ | $\pm 3.16$ | $\pm 0.12$ | $\pm 0.29$ | $\pm 0.07$ | $\pm 1.31$ | $\pm 1.16$ | $\pm 0.01$ | $\pm 1.16$ | $\pm 0.05$ | $\pm 3.64$ | $\pm 0.17$ |
| GWR29 M                                   | 618        | 47.5       | 1.20       | 1.83       | 3.65       | 8.29       | 11.3       | 0.09       | 15.2       | 0.40       | 32.3       | 0.93       |
|                                           | $\pm 61.7$ | $\pm 1.9$  | $\pm 0.07$ | $\pm 0.07$ | $\pm 0.26$ | $\pm 0.41$ | $\pm 0.90$ | $\pm 0.01$ | $\pm 1.06$ | $\pm 0.04$ | $\pm 0.97$ | $\pm 0.03$ |
| GWR29 U                                   | 439        | 15.9       | 0.50       | 0.91       | 1.20       | 4.43       | 5.55       | 0.05       | 18.9       | 0.14       | 65.8       | 1.54       |
|                                           | $\pm 21.9$ | $\pm 1.27$ | $\pm 0.05$ | $\pm 0.10$ | $\pm 0.06$ | $\pm 0.35$ | $\pm 0.61$ | $\pm 0.00$ | $\pm 1.13$ | $\pm 0.01$ | $\pm 3.95$ | $\pm 0.14$ |
| GWR30 L                                   | 467        | 24.2       | 1.02       | 1.65       | 0.58       | 7.48       | 43.1       | 0.06       | 8.96       | 0.18       | 31.3       | 0.90       |
|                                           | $\pm 51.4$ | $\pm 2.18$ | $\pm 0.03$ | $\pm 0.13$ | $\pm 0.05$ | $\pm 0.75$ | $\pm 3.87$ | $\pm 0.01$ | $\pm 0.81$ | $\pm 0.01$ | $\pm 1.25$ | $\pm 0.10$ |
| GWR30 M                                   | 372        | 25.7       | 1.09       | 1.75       | 0.36       | 10.4       | 28.7       | 0.07       | 11.6       | 0.18       | 49.0       | 0.88       |
|                                           | $\pm 33.5$ | $\pm 1.54$ | $\pm 0.11$ | $\pm 0.11$ | $\pm 0.03$ | $\pm 0.31$ | $\pm 3.16$ | $\pm 0.01$ | $\pm 0.93$ | $\pm 0.01$ | $\pm 3.43$ | $\pm 0.07$ |

\*ND – not determined

**Author Contributions:** Conceptualization, I.A.T., E.A.L. and O.C.; methodology, I.A.T., A. M. and C.T.; analysis, I.A.T., A. M. and C.T.; writing—original draft preparation, I.A.T., A.M. and C.T.; writing—review and editing, O.C., E.A.L. and O.T.M.; funding acquisition, O.T.M. All authors have read and agreed to the published version of the manuscript.

**Funding:** Sampling and laboratory analysis were supported by a grant of the Ministry of Research, Innovation and Digitization, CNCS/CCCDI – UEFISCDI, project number 2/2019 (DARKFOOD), within PNCDI III, and results interpretation were supported by the EEA grants 2014-2021, under project GROUNDWATERISK, contract no. 4/2019. The APC was funded by the Ministry of Research, Innovation and Digitization, CNCS/CCCDI – UEFISCDI, project number 2/2019 (DARKFOOD), within PNCDI III.

**Data Availability Statement:** The data presented in this study is available on request from the corresponding author.

**Institutional Review Board Statement:** Not applicable.

**Informed Consent Statement:** Not applicable

**Conflicts of Interest:** The authors declare no conflict of interest. The funders had no role in the design of the study; in the collection, analyses, or interpretation of data; in the writing of the manuscript, or in the decision to publish the results.
